# Supplementary material for: A systematic investigation on synergistic electroplating and capacitive removal of Pb2+ from artificial industrial waste water
Source: Royal Society of Chemistry journal article supplement (doi:10.1039/d1ra01121a), 2021-01-01
Supplement: d1ra01121a1.pdf [file d1ra01121a1.pdf]

## Supplementary

### A Systematic Investigation on Synergistic Electroplating and Capacitive Removal of $\text{Pb}^{2+}$ from Artificial Industrial Waste Water

Yang, Gui<sup>a</sup>, Daniel John Blackwood<sup>b,\*</sup>

The solution flow rate is calculated based on below equation

$$r_{flow} = \frac{V}{t \cdot \text{gram of carbon used}} \text{ ml / (min} \cdot \text{g)}$$

Where  $t$  is the time duration starting from waste water inlet, passing through cell, conductivity meter and pH meter, ending at outlet. The trace is designated by arrows in Figure S1;  $V$  is the total volume of waste water during the time duration.

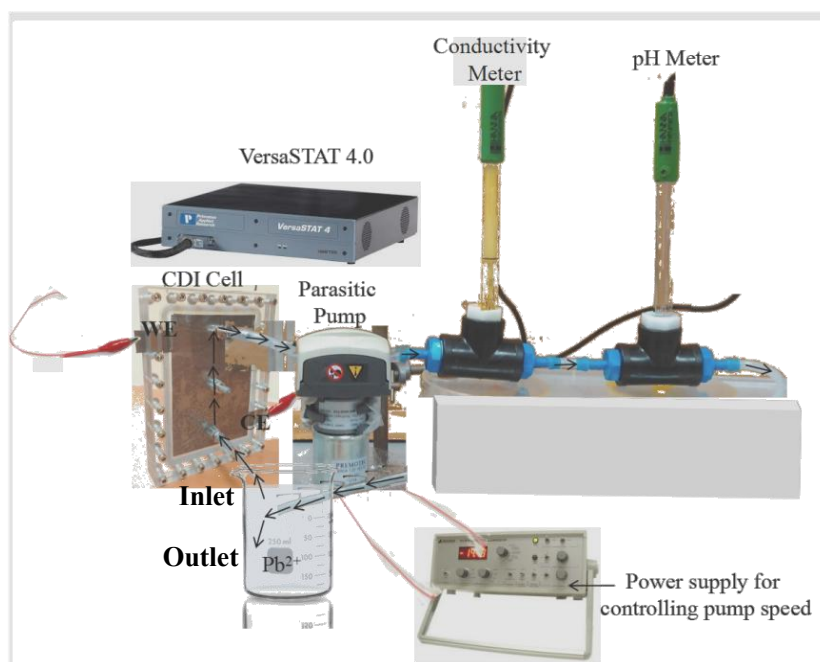

Figure S1 Schematic diagram of the testing system for the removal of  $\text{Pb}^{2+}$

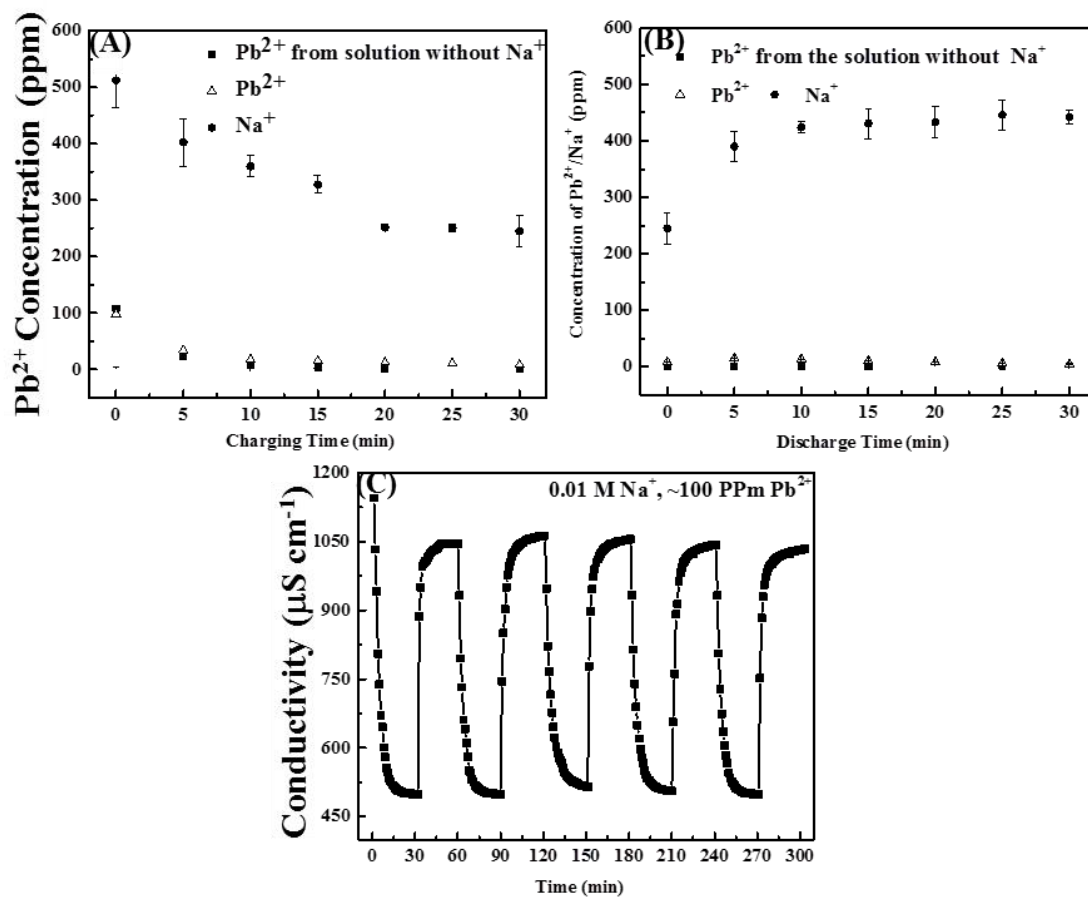

Figure S2 Concentration change of 100 ppm Pb<sup>2+</sup> in multi-cations solution (500 ppm Na<sup>+</sup>) during the first cycle of (A) charge and (B) discharge process; (C) Conductivity change of the solution with multi-salts (Pb(NO<sub>3</sub>)<sub>2</sub>, NaCl) under pumping rate of 70 ml/min and the substrate area of 10 cm × 15cm

Figure S2 displays the impact of multi-ions in the solution on the Pb<sup>2+</sup> removal performance. Through the analysis, it reflects that the removal performance of Pb<sup>2+</sup> will not be interfered under the co-existence of Na<sup>+</sup>. Additionally, the Na<sup>+</sup> in the solution can be realized a total removal of 50% that is 100% reversible, which provides a view angle on Na<sup>+</sup> separation and collection.

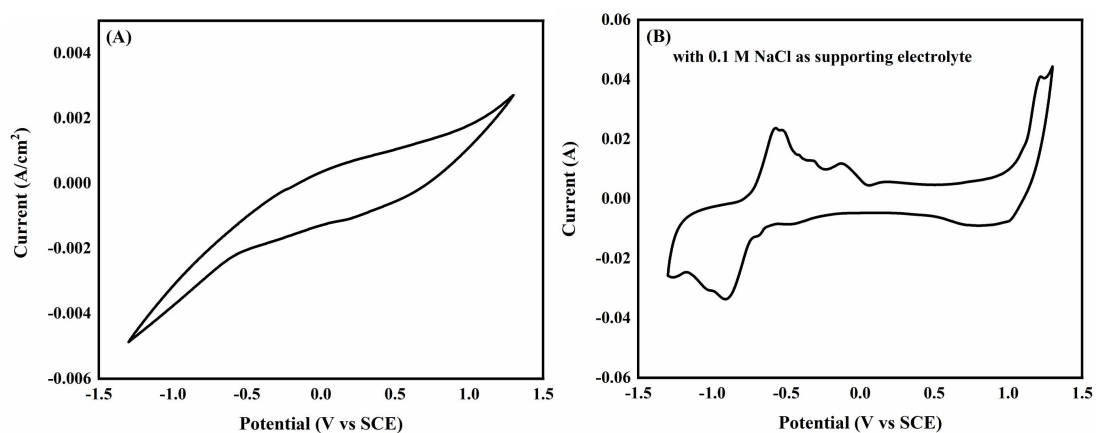

Figure S3 Cyclic voltammetry in 100 ppm  $\text{Pb}^{2+}$  solution with supporting electrolyte of (A) 0 M and (B) 0.1 M NaCl at a scan rate of 50 mV/s

Cyclic voltammetry was also shown in Figure S3, but the high resistance of the 100 ppm  $\text{Pb}^{2+}$  solution meant this were of little value with no clear redox peaks being observable. On the addition of 0.1 M NaCl as supporting electrolyte, redox couples that were consistent with Reactions (1) and (2) along with water splitting were obtained.

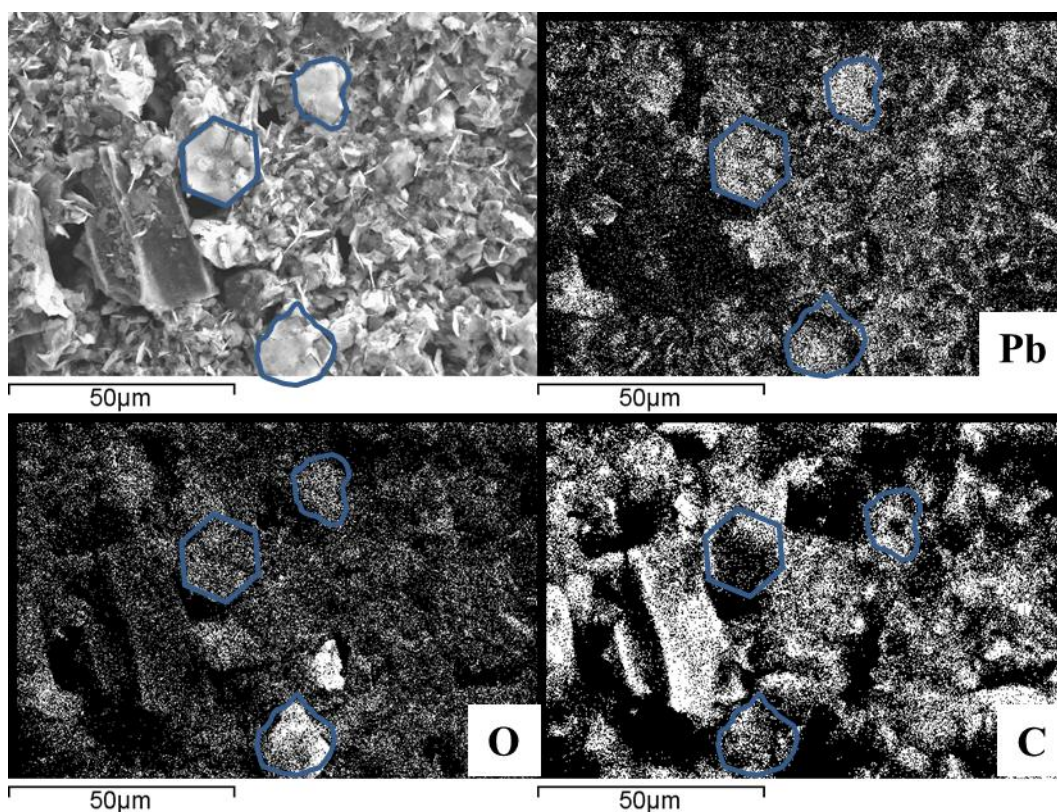

Figure S4 SEM-EDS analysis on the cathode after five cycles of charge/discharge process.

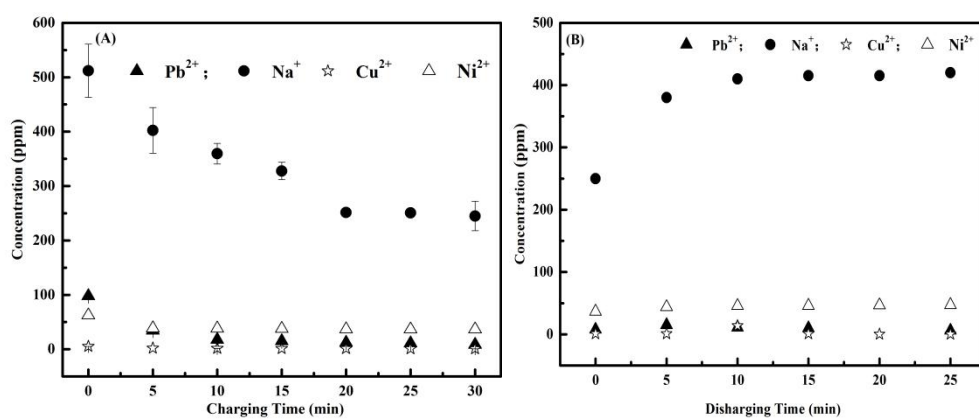

Figure S5 Concentration change of respective ion in the solution during (A) charging and (B) discharging process.

the competitive behavior between  $Pb^{2+}$  and other metals ( $Na^+$ ,  $Cu^{2+}$  and  $Ni^{2+}$ ) has been analyzed by dissolving 100 ppm  $Pb^{2+}$ , 0.1 M NaCl, 5 ppm  $Cu^{2+}$  and 62.5 ppm  $Ni^{2+}$  in 60 ml DI water, which is shown in Figure S5 and displayed below. When compared to

Figure 3, it can be seen that the co-existence of multi-ions did not significantly affect the removal efficiency of  $\text{Pb}^{2+}$  during the charging process. When at discharging state, only NaCl reflects a reversibility >90%, all the other heavy metals show a lower reversibility, which indicates the involvement of other electrochemical reactions; such as electroplating. This was included in the supplemental data in Figure S5 and also updated in the text.
